# Supplementary material for: Glucose-decorated engineering platelets for active and precise tumor-targeted drug delivery
Source: Royal Society of Chemistry journal article supplement (doi:10.1039/d3bm00326d), 2023-01-01
Supplement: d3bm00326d1.pdf [file d3bm00326d1.pdf]

## Glucose Decorated Engineering Platelet for Active and Precise Tumor Targeted Drug Delivery

Jiaxuan Zhao<sup>a,1</sup>, Yan Shi<sup>a,1</sup>, Lixia Xue<sup>b</sup>, Yuqing Liang<sup>b</sup>, Jiale Shen<sup>a</sup>, Jiarui Wang<sup>a</sup>, Meng Wu<sup>a</sup>, Hao Chen<sup>b\*</sup>, Ming Kong<sup>a\*</sup>

<sup>a</sup> *College of Marine Life Science, Ocean University of China, 5 Yushan Road, 266003, Qingdao, China.*

<sup>b</sup> *Department of Neurosurgery, Shanghai Sixth People's Hospital Affiliated to Shanghai Jiao Tong University School of Medicine*

*\* Send Correspondence to: Dr. Ming Kong (E-mail: [kongming@ouc.edu.cn](mailto:kongming@ouc.edu.cn)) & Dr. Hao Chen (E-mail: [hao.chen@shsmu.edu.cn](mailto:hao.chen@shsmu.edu.cn))*

<sup>1</sup> *these two authors contributed equally in this work.*

### Biocompatibility of DPG-PL

L929 was mixed with different concentrations of DPG-PL, and CCK-8 solution was added after co-culture for 24 h, 48 h, and 72 h, respectively. After the reaction in the dark for 2 h, the absorbance value at 450 nm was detected by a microplate reader, and the cell viability was calculated. After coculture for 24 h, the mixture solution of Calcein -AM and propidium iodide (PI) was added and incubated at room temperature for 30 min. Followed by rinsing with PBS for three times and observation under fluorescence microscope.

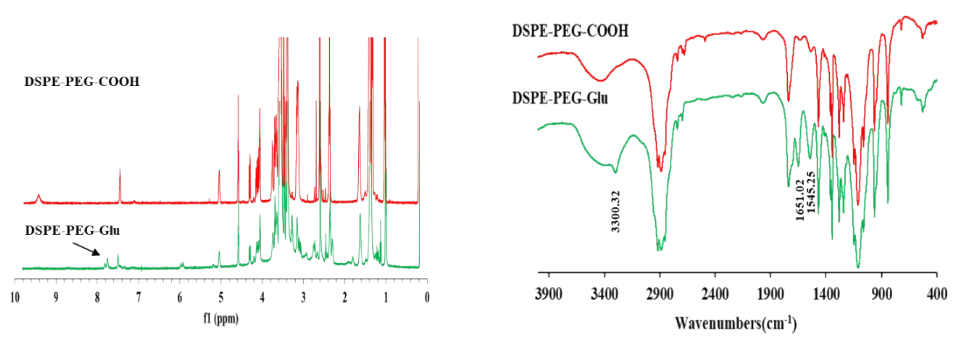

Fig. S1. <sup>1</sup>H NMR spectrum and FTIR absorption spectra of DSPE-PEG-Glu.

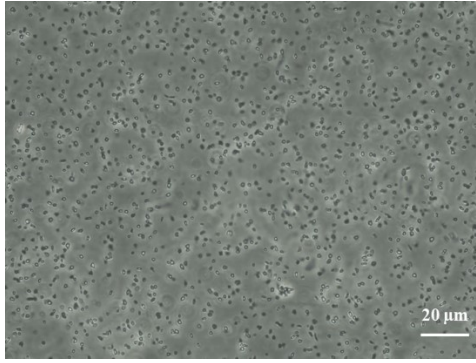

Fig. S2. Representative image of purified platelets (scale bar: 20 µm).

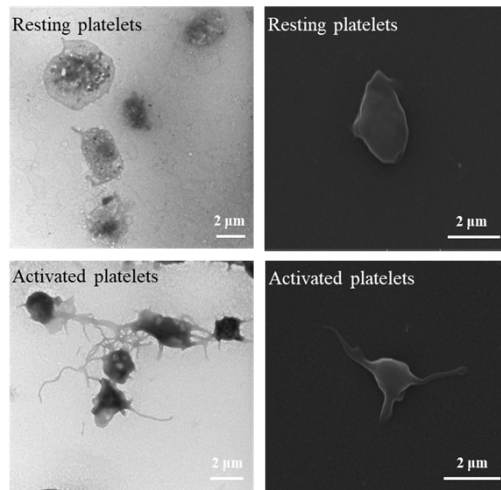

Fig. S3. Representative TEM image and SEM image of resting platelets and activated Platelet (scale bar: 2 μm).

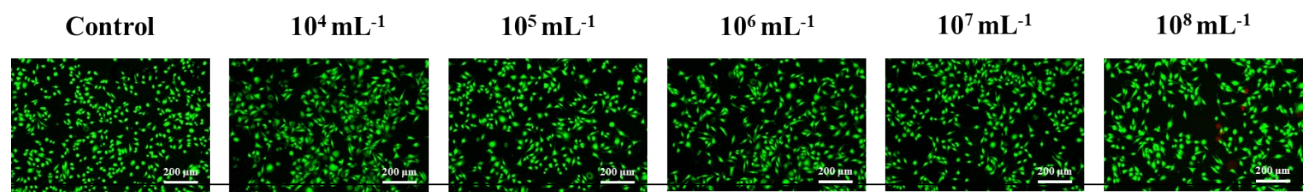

Fig. S4. Live/dead assays for DPG-PL -treated L929 (scale bar: 100  $\mu\text{m}$ , n=5).

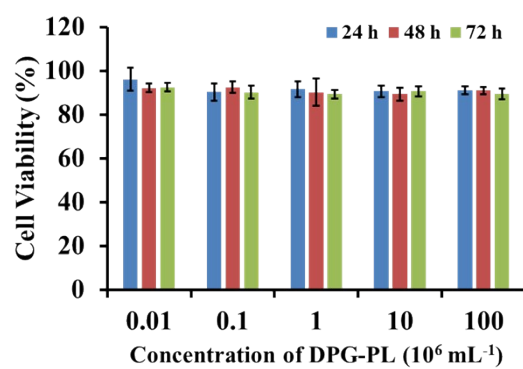

Fig. S5. Viability L929 after incubation with different concentration of DPG-PL (n=5).

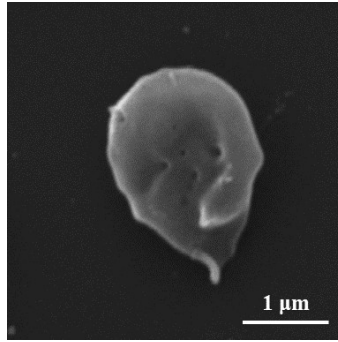

Fig. S6. Representative SEM image of DPG-PL@DOX (scale bar: 1  $\mu\text{m}$ ).



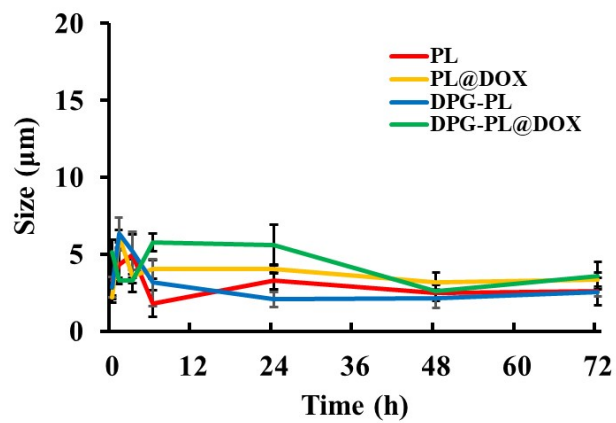

Fig. S7. Changes of PL, PL@DOX, DPG-PL, DPG-PL@DOX particle size in 72h.

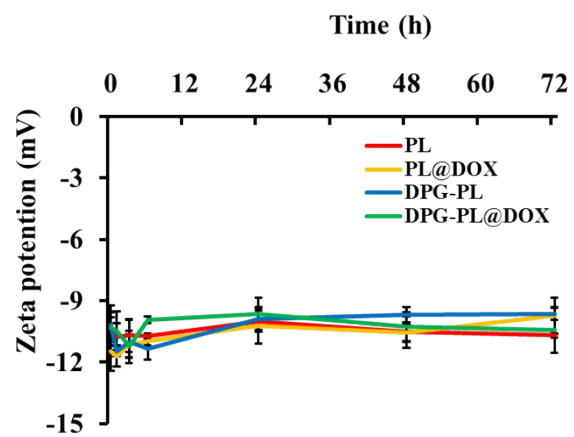

Fig. S8. Changes of PL, PL@DOX, DPG-PL, DPG-PL@DOX Zeta potential in 72h.

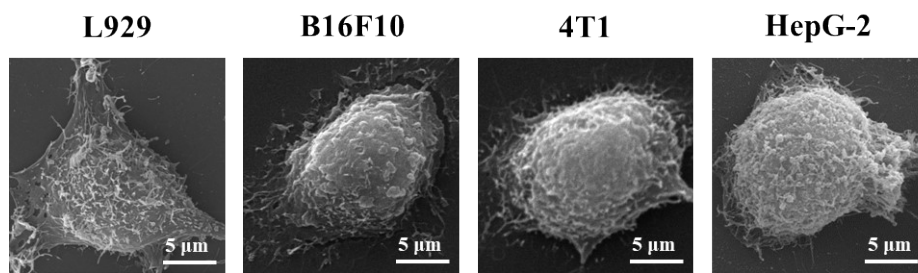

Fig. S9. Representative SEM images of L929, 4T1, B16F10 and HepG-2.

Table S1 Influence of NC, DOX, PL@DOX, and DPG-PL@DOX on heart, liver, and kidney function after different treatments using serum biochemical analysis.

| Groups     | CK-MB <sup>1</sup> | ALT <sup>2</sup> | AST <sup>3</sup> | AST/ALT       | TBIL <sup>4</sup> | CREA <sup>5</sup> | UA <sup>6</sup>  |
|------------|--------------------|------------------|------------------|---------------|-------------------|-------------------|------------------|
| Normal     | 157.06<br>±21.72   | 54.91<br>±4.6    | 145.95<br>±7.34  | 2.66<br>±1.6  | 7.06<br>±0.47     | 34.99<br>±7.77    | 99.89<br>±7.18   |
| NC         | 143.67<br>±31.84   | 46.81<br>±5.19   | 148.62<br>±7.33  | 3.17<br>±1.4  | 7.29<br>±0.7      | 33.32<br>±12.12   | 119.65<br>±12.77 |
| DOX        | 242.83<br>±37.09   | 48.42<br>±2.2    | 155.3<br>±11.77  | 3.21<br>±5.48 | 7.12<br>±0.4      | 45.52<br>±9.94    | 128.44<br>±14.43 |
| PL@DOX     | 219.77<br>±34.15   | 42.47<br>±7.66   | 150.37<br>±16.15 | 3.54<br>±2.16 | 7.97<br>±0.99     | 34.18<br>±6.31    | 103.86<br>±15.92 |
| DPG-PL@DOX | 181.03<br>±27.57   | 56.86<br>±8.48   | 156.23<br>±16.78 | 2.75<br>±1.97 | 7.01<br>±0.65     | 36.74<br>±6.44    | 112.22<br>±11.47 |

The heart function is evaluated with serum level of <sup>1</sup> creatine kinase isoenzyme-MB (CK-MB, U L<sup>-1</sup>). The liver function is evaluated with serum levels of <sup>2</sup> alanine aminotransferase (ALT, U L<sup>-1</sup>), <sup>3</sup> aspartate aminotransferase (AST, U L<sup>-1</sup>) and <sup>4</sup>total bilirubin level (TBIL, μmol L<sup>-1</sup>). The kidney function is evaluated with serum levels of <sup>5</sup> creatinine (CREA, μmol L<sup>-1</sup>), f uric acid (UA, μmol L<sup>-1</sup>).
